# Supplementary material
Source: publisher figshare collection journal article supplement (https://gsapubs.figshare.com/ndownloader/files/25187252)
Supplement: Supplementary file 1 [file 25187252]

## Sheet: TableS2ABC_misfits
TABLE S3A. MODEL GOODNESS OF FIT RESULTS, POSTSEISMIC-REDUCED GPS FIELD
Reduced GPS Velocity Field
Model name	Reduced χ2 misfit value	Degrees of freedom	Number of parameters	GPS data NRMS	GPS data WRMS (mm)	RMS residuals to geologic slip rates	RMS residuals to Holocene geologic slip rates	RMS residuals to Pleistocene geologic slip rates
SGP1	8.01	344	48	2.652	0.875	5.42227	3.96526	6.08761
SGP2	7.868	347	45	2.639	0.87	5.40972	4.023	6.05192
SGP3	8.735	350	42	2.793	0.921	5.51804	4.468	6.18985
SGP4	8.715	350	42	2.789	0.92	5.36437	3.819	6.07156
SGP5	8.273	350	42	2.718	0.896	5.39338	3.785	6.09981
SGP6	9.396	353	39	2.909	0.959	5.65448	3.777	6.42962
SGP7	8.977	353	39	2.843	0.938	5.73129	3.595	6.58744
SGP8	8.057	353	39	2.694	0.888	5.99766	4.308	6.67375
SGP9	8.651	353	39	2.791	0.921	5.76224	4.495	6.24413
SGP10	9.185	356	36	2.888	0.952	5.97181	4.264	6.63499
SGP11	16.861	362	30	3.946	1.301	6.28257	5.186	7.1565
SGP12	12.381	368	24	3.409	1.124	8.87529	8.91	7.86949
SGP13	12.791	371	21	3.504	1.156	6.88875	3.635	8.14134
SGP14	13.438	374	18	3.581	1.181	9.20531	8.982	8.45715
SGP15	28.071	374	18	5.175	1.707	8.67212	9.18	7.22175
SGP16	17.328	377	15	4.082	1.346	10.2059	9.561	9.94461
TABLE S3B. MODEL GOODNESS OF FIT RESULTS, OBSERVED GPS FIELD
Observed GPS Velocity Field (unreduced)
Model name	Reduced χ2 misfit value	Degrees of freedom	Number of parameters	GPS data NRMS	GPS data WRMS (mm)	RMS residuals to geologic slip rates	RMS residuals to Holocene geologic slip rates	RMS residuals to Pleistocene geologic slip rates
SGP1	12.655	344	48	3.3	1.1	5.83381	3.53392	6.8231
SGP2	12.46	349	45	3.322	1.076	5.73999	3.245	6.79841
SGP3	13.822	355	39	3.529	1.143	6.52663	4.263	7.37125
SGP4	13.742	352	42	3.504	1.135	5.60476	2.89	6.73375
SGP5	12.937	352	42	3.4	1.101	6.17624	3.43	7.40762
SGP6	15.401	355	39	3.725	1.207	6.32498	2.812	7.56777
SGP7	13.943	355	39	3.544	1.148	6.01621	2.891	7.21338
SGP8	12.711	355	39	3.384	1.096	6.36652	3.939	7.35725
SGP9	13.134	352	42	3.425	1.11	6.00347	3.114	7.12223
SGP10	14.318	358	36	3.607	1.169	6.21803	3.663	7.24004
SGP11	22.111	376	18	4.594	1.488	10.6733	8.852	10.7688
SGP12	20.951	370	24	4.436	1.437	9.69261	8.737	9.31793
SGP13	21.503	364	30	4.457	1.444	7.73237	5.5	9.05083
SGP14	21.71	373	21	4.533	1.469	8.71631	3.153	10.5109
SGP15	57.477	376	18	7.406	2.399	8.70204	9.212	7.20598
SGP16	26.354	379	15	5.035	1.631	11.5987	9.553	12.1146
TABLE S3C. MODEL GOODNESS OF FIT RESULTS, PARTIALLY REDUCED FIELD
Observed GPS Velocity Field (partially reduced)
Model name	Reduced χ2 misfit value	Degrees of freedom	Number of parameters	GPS data NRMS	GPS data WRMS (mm)	RMS residuals to geologic slip rates	RMS residuals to Holocene geologic slip rates	RMS residuals to Pleistocene geologic slip rates
SGP1	11.323	344	48	3.2	1	5.30103	3.50688	6.11675
SGP2	11.133	345	45	3.138	1.106	5.18802	3.263	6.06371
SGP3	11.816	348	42	3.247	1.051	5.59906	3.442	6.67247
SGP4	12.106	348	42	3.287	1.064	5.02943	2.97	5.95602
SGP5	11.684	348	42	3.229	1.045	5.31833	3.135	6.22572
SGP6	13.44	351	39	3.478	1.126	5.49176	2.92	6.47934
SGP7	12.298	351	39	3.327	1.077	5.46991	2.953	6.48661
SGP8	11.396	351	39	3.203	1.037	5.92981	4.088	6.68793
SGP9	12.318	351	39	3.33	1.078	5.90911	4.324	6.49458
SGP10	12.679	354	36	3.392	1.098	5.73919	3.898	6.48951
SGP11	20.387	360	30	4.338	1.405	7.50241	5.405	8.79148
SGP12	18.108	366	24	4.122	1.335	9.61714	8.761	9.17226
SGP13	18.516	369	21	4.186	1.355	8.42402	3.27	10.1153
SGP14	19.355	372	18	4.297	1.391	10.4805	8.868	10.4675
SGP15	51.136	372	18	6.984	2.261	8.88639	9.519	7.27112
SGP16	23.782	375	15	4.782	1.548	11.4316	9.555	11.8639
